# Supplementary material
Source: publisher figshare collection journal article supplement (https://aacr.figshare.com/ndownloader/files/39884377)
Supplement: Supplementary file 1 [file 39884377]

\*Each row shows the percent European ancestry for a particular individual (first column) and the standard deviation for this estimate (second column).

| Percent european ancestry* | Standard Deviation |
|----------------------------|--------------------|
| 19%                        | 3%                 |
| 28%                        | 3%                 |
| 21%                        | 3%                 |
| 8%                         | 1%                 |
| 24%                        | 3%                 |
| 19%                        | 2%                 |
| 15%                        | 2%                 |
| 24%                        | 3%                 |
| 28%                        | 4%                 |
| 12%                        | 2%                 |
| 14%                        | 2%                 |
| 36%                        | 4%                 |
| 17%                        | 3%                 |
| 26%                        | 3%                 |
| 25%                        | 2%                 |
| 17%                        | 3%                 |
| 8%                         | 2%                 |
| 5%                         | 1%                 |
| 7%                         | 2%                 |
| 11%                        | 2%                 |
| 16%                        | 2%                 |
| 23%                        | 3%                 |
| 27%                        | 2%                 |
| 16%                        | 2%                 |
| 17%                        | 3%                 |
| 23%                        | 3%                 |
| 32%                        | 3%                 |
| 11%                        | 2%                 |
| 43%                        | 4%                 |
| 32%                        | 4%                 |
| 25%                        | 3%                 |

|     |    |
|-----|----|
| 25% | 3% |
| 21% | 2% |
| 37% | 3% |
| 13% | 3% |
| 13% | 2% |
| 17% | 2% |
| 16% | 3% |
| 58% | 5% |
| 35% | 3% |
| 40% | 3% |
| 18% | 3% |
| 8%  | 2% |
| 9%  | 2% |
| 27% | 3% |
| 24% | 3% |
| 23% | 3% |
| 34% | 3% |
| 97% | 1% |
| 24% | 3% |
| 12% | 2% |
| 24% | 3% |
| 47% | 3% |
| 20% | 2% |
| 10% | 2% |
| 34% | 3% |
| 19% | 3% |
| 21% | 2% |
| 24% | 3% |
| 9%  | 1% |
| 22% | 3% |
| 18% | 2% |
| 9%  | 2% |
| 11% | 2% |
| 11% | 2% |

|     |    |
|-----|----|
| 29% | 3% |
| 5%  | 1% |
| 17% | 2% |
| 9%  | 2% |
| 19% | 3% |
| 30% | 3% |
| 35% | 3% |
| 9%  | 2% |
| 19% | 2% |
| 15% | 2% |
| 11% | 2% |
| 26% | 3% |
| 23% | 3% |
| 32% | 3% |
| 20% | 3% |
| 43% | 3% |
| 10% | 2% |
| 32% | 3% |
| 59% | 2% |
| 20% | 3% |
| 19% | 2% |
| 16% | 2% |
| 20% | 3% |
| 13% | 3% |
| 40% | 3% |
| 14% | 2% |
| 18% | 3% |
| 27% | 3% |
| 33% | 3% |
| 7%  | 2% |
| 98% | 1% |
| 19% | 3% |
| 12% | 2% |
| 60% | 4% |

|     |    |
|-----|----|
| 20% | 3% |
| 8%  | 2% |
| 26% | 3% |
| 16% | 2% |
| 15% | 2% |
| 15% | 2% |
| 13% | 3% |
| 40% | 3% |
| 13% | 2% |
| 21% | 3% |
| 9%  | 2% |
| 50% | 3% |
| 33% | 3% |
| 20% | 3% |
| 16% | 3% |
| 62% | 4% |
| 33% | 3% |
| 8%  | 2% |
| 38% | 4% |
| 15% | 2% |
| 10% | 2% |
| 34% | 3% |
| 26% | 3% |
| 32% | 3% |
| 21% | 3% |
| 23% | 3% |
| 27% | 3% |
| 51% | 3% |
| 8%  | 2% |
| 23% | 3% |
| 19% | 3% |
| 27% | 3% |
| 8%  | 2% |
| 16% | 2% |

|     |    |
|-----|----|
| 62% | 4% |
| 97% | 1% |
| 96% | 1% |
| 24% | 2% |
| 32% | 3% |
| 98% | 1% |
| 13% | 2% |
| 26% | 3% |
| 37% | 3% |
| 6%  | 2% |
| 26% | 2% |
| 20% | 3% |
| 18% | 3% |
| 11% | 2% |
| 6%  | 2% |
| 16% | 3% |
| 29% | 3% |
| 11% | 2% |
| 14% | 2% |
| 32% | 3% |
| 13% | 3% |
| 16% | 3% |
| 11% | 2% |
| 33% | 4% |
| 9%  | 2% |
| 37% | 4% |
| 15% | 2% |
| 25% | 3% |
| 34% | 3% |
| 35% | 4% |
| 14% | 3% |
| 10% | 2% |
| 20% | 3% |
| 18% | 3% |

|     |    |
|-----|----|
| 16% | 2% |
| 28% | 3% |
| 14% | 2% |
| 40% | 3% |
| 16% | 3% |
| 31% | 3% |
| 31% | 3% |
| 5%  | 1% |
| 19% | 3% |
| 23% | 3% |
| 21% | 2% |
| 23% | 3% |
| 28% | 3% |
| 18% | 3% |
| 20% | 2% |
| 30% | 3% |
| 11% | 2% |
| 15% | 2% |
| 4%  | 2% |
| 21% | 3% |
| 23% | 3% |
| 13% | 2% |
| 45% | 3% |
| 25% | 3% |
| 18% | 3% |
| 15% | 2% |
| 10% | 2% |
| 19% | 3% |
| 14% | 2% |
| 15% | 3% |
| 55% | 4% |
| 20% | 3% |
| 20% | 3% |
| 25% | 3% |

|     |    |
|-----|----|
| 22% | 3% |
| 25% | 3% |
| 18% | 2% |
| 34% | 4% |
| 40% | 4% |
| 34% | 3% |
| 14% | 2% |
| 26% | 3% |
| 29% | 4% |
| 7%  | 2% |
| 22% | 4% |
| 26% | 3% |
| 52% | 3% |
| 22% | 3% |
| 17% | 3% |
| 21% | 3% |
| 12% | 2% |
| 33% | 3% |
| 21% | 3% |
| 28% | 4% |
| 13% | 2% |
| 12% | 2% |
| 11% | 2% |
| 18% | 3% |
| 21% | 3% |
| 23% | 3% |
| 11% | 2% |
| 31% | 4% |
| 10% | 2% |
| 8%  | 2% |
| 16% | 3% |
| 24% | 3% |
| 22% | 3% |
| 25% | 3% |

|     |    |
|-----|----|
| 23% | 3% |
| 24% | 3% |
| 20% | 3% |
| 16% | 2% |
| 36% | 4% |
| 12% | 2% |
| 12% | 2% |
| 19% | 3% |
| 28% | 3% |
| 21% | 2% |
| 13% | 2% |
| 67% | 3% |
| 12% | 2% |
| 20% | 3% |
| 29% | 3% |
| 10% | 2% |
| 20% | 3% |
| 11% | 2% |
| 95% | 1% |
| 26% | 3% |
| 23% | 3% |
| 35% | 4% |
| 26% | 3% |
| 27% | 4% |
| 22% | 3% |
| 23% | 3% |
| 11% | 2% |
| 13% | 2% |
| 11% | 2% |
| 24% | 2% |
| 23% | 3% |
| 22% | 3% |
| 15% | 2% |
| 17% | 3% |



|     |    |
|-----|----|
| 22% | 3% |
| 15% | 3% |
| 17% | 2% |
| 20% | 3% |
| 30% | 3% |
| 39% | 3% |
| 18% | 2% |
| 30% | 3% |
| 30% | 4% |
| 28% | 3% |
| 13% | 2% |
| 17% | 2% |
| 14% | 2% |
| 6%  | 1% |
| 18% | 3% |
| 19% | 2% |
| 14% | 2% |
| 13% | 2% |
| 28% | 3% |
| 43% | 4% |
| 13% | 2% |
| 17% | 2% |
| 26% | 3% |
| 37% | 3% |
| 26% | 3% |
| 16% | 2% |
| 42% | 4% |
| 13% | 2% |
| 17% | 2% |
| 12% | 2% |
| 28% | 3% |
| 16% | 3% |
| 64% | 4% |
| 9%  | 2% |

|     |    |
|-----|----|
| 14% | 2% |
| 5%  | 1% |
| 37% | 4% |
| 11% | 2% |
| 7%  | 2% |
| 8%  | 2% |
| 8%  | 2% |
| 27% | 3% |
| 15% | 3% |
| 13% | 2% |
| 12% | 2% |
| 24% | 3% |
| 28% | 4% |
| 32% | 3% |
| 25% | 3% |
| 22% | 3% |
| 33% | 3% |
| 15% | 2% |
| 14% | 2% |
| 19% | 3% |
| 42% | 4% |
| 17% | 3% |
| 21% | 3% |
| 21% | 3% |
| 20% | 3% |
| 7%  | 2% |
| 37% | 3% |
| 23% | 3% |
| 21% | 3% |
| 22% | 3% |
| 18% | 2% |
| 20% | 2% |
| 12% | 2% |
| 25% | 3% |

|     |    |
|-----|----|
| 55% | 4% |
| 7%  | 2% |
| 29% | 3% |
| 36% | 4% |
| 31% | 3% |
| 12% | 2% |
| 6%  | 2% |
| 21% | 2% |
| 13% | 2% |
| 29% | 3% |
| 16% | 2% |
| 22% | 3% |
| 12% | 2% |
| 7%  | 2% |
| 13% | 2% |
| 15% | 3% |
| 31% | 3% |
| 25% | 3% |
| 49% | 3% |
| 6%  | 2% |
| 12% | 2% |
| 10% | 2% |
| 23% | 3% |
| 14% | 2% |
| 46% | 4% |
| 15% | 2% |
| 13% | 2% |
| 27% | 3% |
| 24% | 3% |
| 37% | 3% |
| 21% | 3% |
| 27% | 3% |
| 9%  | 2% |
| 32% | 3% |

|     |    |
|-----|----|
| 10% | 2% |
| 27% | 3% |
| 17% | 3% |
| 15% | 2% |
| 13% | 2% |
| 47% | 3% |
| 16% | 2% |
| 26% | 4% |
| 35% | 3% |
| 12% | 2% |
| 36% | 3% |
| 21% | 3% |
| 10% | 2% |
| 11% | 2% |
| 19% | 3% |
| 14% | 2% |
| 17% | 3% |
| 13% | 2% |
| 22% | 3% |
| 7%  | 2% |
| 49% | 4% |
| 14% | 2% |
| 29% | 3% |
| 43% | 3% |
| 4%  | 1% |
| 31% | 4% |
| 33% | 4% |
| 15% | 2% |
| 38% | 4% |
| 32% | 3% |
| 44% | 4% |
| 28% | 3% |
| 15% | 3% |
| 12% | 2% |

|     |    |
|-----|----|
| 17% | 2% |
| 15% | 2% |
| 16% | 2% |
| 34% | 3% |
| 12% | 2% |
| 4%  | 1% |
| 4%  | 1% |
| 14% | 2% |
| 20% | 3% |
| 14% | 2% |
| 43% | 4% |
| 12% | 2% |
| 15% | 2% |
| 47% | 4% |
| 52% | 4% |
| 15% | 3% |
| 30% | 3% |
| 19% | 2% |
| 14% | 2% |
| 31% | 3% |
| 12% | 2% |
| 31% | 3% |
| 9%  | 2% |
| 19% | 3% |
| 18% | 3% |
| 13% | 3% |
| 12% | 2% |
| 16% | 3% |
| 6%  | 1% |
| 97% | 1% |
| 34% | 4% |
| 26% | 3% |
| 37% | 3% |
| 20% | 3% |

|     |    |
|-----|----|
| 7%  | 2% |
| 15% | 2% |
| 34% | 4% |
| 16% | 2% |
| 20% | 3% |
| 18% | 2% |
| 22% | 2% |
| 53% | 4% |
| 18% | 3% |
| 56% | 3% |
| 15% | 2% |
| 27% | 3% |
| 8%  | 2% |
| 10% | 2% |
| 38% | 3% |
| 26% | 3% |
| 14% | 3% |
| 44% | 4% |
| 27% | 3% |
| 18% | 2% |
| 15% | 2% |
| 14% | 2% |
| 56% | 5% |
| 36% | 3% |
| 61% | 3% |
| 27% | 3% |
| 23% | 2% |
| 44% | 3% |
| 15% | 2% |
| 17% | 3% |
| 14% | 2% |
| 39% | 3% |
| 22% | 2% |
| 18% | 3% |

|     |    |
|-----|----|
| 38% | 4% |
| 42% | 3% |
| 9%  | 2% |
| 21% | 3% |
| 12% | 2% |
| 19% | 3% |
| 27% | 3% |
| 28% | 3% |
| 14% | 2% |
| 21% | 3% |
| 9%  | 2% |
| 9%  | 2% |
| 30% | 3% |
| 18% | 2% |
| 22% | 3% |
| 27% | 3% |
| 12% | 2% |
| 22% | 3% |
| 15% | 2% |
| 21% | 2% |
| 24% | 3% |
| 5%  | 2% |
| 19% | 3% |
| 13% | 3% |
| 15% | 2% |
| 24% | 3% |
| 39% | 4% |
| 10% | 2% |
| 24% | 3% |
| 17% | 2% |
| 6%  | 2% |
| 17% | 2% |
| 7%  | 2% |
| 33% | 3% |

|     |    |
|-----|----|
| 43% | 3% |
| 23% | 3% |
| 15% | 3% |
| 35% | 4% |
| 63% | 4% |
| 9%  | 2% |
| 14% | 2% |
| 14% | 2% |
| 10% | 2% |
| 25% | 3% |
| 22% | 3% |
| 26% | 3% |
| 6%  | 2% |
| 28% | 3% |
| 39% | 4% |
| 7%  | 2% |
| 19% | 3% |
| 4%  | 1% |
| 45% | 5% |
| 42% | 4% |
| 12% | 2% |
| 57% | 4% |
| 37% | 4% |
| 25% | 3% |
| 37% | 4% |
| 4%  | 1% |
| 11% | 2% |
| 13% | 2% |
| 29% | 4% |
| 29% | 3% |
| 62% | 4% |
| 56% | 4% |
| 14% | 2% |
| 47% | 4% |



|     |    |
|-----|----|
| 34% | 3% |
| 28% | 3% |
| 16% | 3% |
| 33% | 3% |
| 16% | 3% |
| 25% | 3% |
| 28% | 3% |
| 37% | 4% |
| 38% | 4% |
| 41% | 5% |
| 4%  | 1% |
| 23% | 3% |
| 17% | 3% |
| 19% | 3% |
| 26% | 3% |
| 16% | 3% |
| 51% | 4% |
| 12% | 2% |
| 90% | 2% |
| 12% | 3% |
| 15% | 2% |
| 11% | 3% |
| 39% | 3% |
| 91% | 2% |
| 54% | 4% |
| 26% | 3% |
| 13% | 2% |
| 13% | 2% |
| 10% | 2% |
| 23% | 3% |
| 24% | 3% |
| 18% | 3% |
| 12% | 2% |
| 16% | 3% |

|     |    |
|-----|----|
| 9%  | 2% |
| 20% | 3% |
| 3%  | 1% |
| 8%  | 2% |
| 23% | 3% |
| 15% | 2% |
| 12% | 2% |
| 37% | 4% |
| 3%  | 1% |
| 18% | 3% |
| 34% | 4% |
| 74% | 3% |
| 10% | 2% |
| 33% | 3% |
| 66% | 4% |
| 19% | 2% |
| 14% | 2% |
| 14% | 2% |
| 4%  | 1% |
| 14% | 2% |
| 18% | 3% |
| 5%  | 2% |
| 13% | 2% |
| 19% | 3% |
| 24% | 3% |
| 25% | 3% |
| 21% | 3% |
| 21% | 3% |
| 28% | 4% |
| 19% | 2% |
| 41% | 4% |
| 7%  | 2% |
| 14% | 3% |
| 26% | 3% |

|     |    |
|-----|----|
| 9%  | 2% |
| 14% | 2% |
| 16% | 3% |
| 18% | 3% |
| 24% | 3% |
| 36% | 3% |
| 15% | 2% |
| 9%  | 2% |
| 55% | 4% |
| 97% | 1% |
| 17% | 3% |
| 9%  | 2% |
| 56% | 3% |
| 33% | 4% |
| 74% | 3% |
| 42% | 3% |
| 23% | 3% |
| 71% | 4% |
| 16% | 3% |
| 22% | 3% |
| 25% | 3% |
| 5%  | 2% |
| 9%  | 2% |
| 47% | 3% |
| 25% | 3% |
| 36% | 4% |
| 13% | 3% |
| 28% | 3% |
| 6%  | 2% |
| 19% | 2% |
| 21% | 3% |
| 9%  | 2% |
| 18% | 3% |
| 33% | 3% |

|     |    |
|-----|----|
| 22% | 3% |
| 21% | 3% |
| 18% | 3% |
| 9%  | 2% |
| 13% | 2% |
| 12% | 2% |
| 31% | 4% |
| 46% | 4% |
| 14% | 3% |
| 12% | 2% |
| 25% | 3% |
| 9%  | 2% |
| 59% | 4% |
| 17% | 3% |
| 40% | 4% |
| 23% | 3% |
| 24% | 3% |
| 35% | 4% |
| 36% | 4% |
| 35% | 3% |
| 7%  | 2% |
| 10% | 2% |
| 27% | 3% |
| 14% | 2% |
| 38% | 4% |
| 29% | 3% |
| 11% | 2% |
| 34% | 3% |
| 56% | 3% |
| 17% | 3% |
| 13% | 2% |
| 16% | 2% |
| 19% | 2% |
| 10% | 2% |

|     |    |
|-----|----|
| 17% | 3% |
| 31% | 3% |
| 37% | 3% |
| 21% | 3% |
| 12% | 2% |
| 30% | 3% |
| 4%  | 1% |
| 52% | 4% |
| 37% | 4% |
| 20% | 3% |
| 48% | 4% |
| 26% | 3% |
| 14% | 2% |
| 31% | 4% |
| 10% | 2% |
| 13% | 2% |
| 34% | 3% |
| 21% | 3% |
| 36% | 3% |
| 6%  | 1% |
| 54% | 4% |
| 42% | 3% |
| 91% | 1% |
| 80% | 3% |
| 20% | 3% |
| 2%  | 1% |
| 22% | 3% |
| 21% | 3% |
| 27% | 3% |
| 26% | 4% |
| 4%  | 2% |
| 15% | 2% |
| 24% | 3% |
| 10% | 2% |

|     |    |
|-----|----|
| 27% | 4% |
| 26% | 2% |
| 20% | 3% |
| 23% | 3% |
| 17% | 2% |
| 37% | 3% |
| 26% | 3% |
| 25% | 3% |
| 15% | 3% |
| 14% | 3% |
| 90% | 2% |
| 10% | 2% |
| 20% | 3% |
| 26% | 3% |
| 18% | 3% |
| 21% | 3% |
| 12% | 2% |
| 18% | 2% |
| 19% | 2% |
| 27% | 3% |
| 41% | 4% |
| 24% | 3% |
| 7%  | 2% |
| 47% | 5% |
| 18% | 2% |
| 33% | 3% |
| 7%  | 2% |
| 26% | 3% |
| 12% | 2% |
| 26% | 3% |
| 15% | 2% |
| 6%  | 2% |
| 33% | 4% |
| 37% | 4% |

|     |    |
|-----|----|
| 14% | 2% |
| 28% | 3% |
| 18% | 3% |
| 22% | 3% |
| 28% | 3% |
| 9%  | 2% |
| 33% | 4% |
| 48% | 4% |
| 25% | 3% |
| 47% | 3% |
| 34% | 4% |
| 16% | 3% |
| 8%  | 2% |
| 20% | 3% |
| 6%  | 2% |
| 35% | 4% |
| 9%  | 2% |
| 23% | 3% |
| 8%  | 2% |
| 9%  | 2% |
| 32% | 3% |
| 25% | 3% |
| 56% | 4% |
| 42% | 4% |
| 14% | 2% |
| 39% | 4% |
| 22% | 3% |
| 7%  | 2% |
| 25% | 3% |
| 39% | 4% |
| 21% | 3% |
| 28% | 3% |
| 25% | 3% |
| 31% | 4% |

|     |    |
|-----|----|
| 53% | 3% |
| 24% | 3% |
| 73% | 4% |
| 6%  | 2% |
| 9%  | 2% |
| 24% | 3% |
| 10% | 2% |
| 15% | 2% |
| 28% | 3% |
| 11% | 2% |
| 58% | 3% |
| 24% | 3% |
| 12% | 3% |
| 8%  | 2% |
| 13% | 2% |
| 18% | 3% |
| 12% | 3% |
| 35% | 3% |
| 18% | 3% |
| 32% | 3% |
| 12% | 2% |
| 9%  | 2% |
| 26% | 3% |
| 10% | 2% |
| 12% | 2% |
| 25% | 3% |
| 46% | 4% |
| 26% | 3% |
| 14% | 2% |
| 19% | 3% |
| 13% | 3% |
| 20% | 3% |
| 32% | 3% |
| 34% | 3% |



|     |    |
|-----|----|
| 14% | 2% |
| 16% | 3% |
| 19% | 3% |
| 14% | 2% |
| 25% | 3% |
| 17% | 3% |
| 62% | 3% |
| 27% | 4% |
| 22% | 3% |
| 31% | 3% |
| 19% | 3% |
| 25% | 3% |
| 31% | 3% |
| 16% | 3% |
| 34% | 3% |
| 14% | 3% |
| 9%  | 2% |
| 27% | 3% |
| 52% | 4% |
| 11% | 3% |
| 33% | 3% |
| 41% | 4% |
| 20% | 2% |
| 13% | 3% |
| 32% | 3% |
| 33% | 3% |
| 34% | 3% |
| 40% | 4% |
| 26% | 3% |
| 23% | 3% |
| 19% | 3% |
| 46% | 3% |
| 9%  | 2% |
| 26% | 3% |

|     |    |
|-----|----|
| 4%  | 1% |
| 29% | 4% |
| 52% | 4% |
| 29% | 4% |
| 31% | 3% |
| 16% | 4% |
| 14% | 3% |
| 12% | 2% |
| 15% | 3% |
| 11% | 2% |
| 19% | 4% |
| 20% | 3% |
| 19% | 2% |
| 13% | 2% |
| 52% | 3% |
| 29% | 3% |
| 10% | 2% |
| 10% | 2% |
| 20% | 3% |
| 48% | 4% |
| 30% | 3% |
| 29% | 4% |
| 15% | 2% |
| 33% | 3% |
| 52% | 3% |
| 36% | 3% |
| 49% | 4% |
| 23% | 2% |
| 42% | 4% |
| 43% | 4% |
| 42% | 3% |
| 22% | 3% |
| 21% | 3% |
| 14% | 2% |

|     |    |
|-----|----|
| 40% | 4% |
| 29% | 4% |
| 31% | 4% |
| 44% | 4% |
| 9%  | 2% |
| 28% | 3% |
| 42% | 3% |
| 25% | 3% |
| 39% | 3% |
| 5%  | 1% |
| 14% | 3% |
| 26% | 3% |
| 2%  | 1% |
| 14% | 2% |
| 21% | 3% |
| 13% | 3% |
| 6%  | 2% |
| 8%  | 2% |
| 4%  | 1% |
| 1%  | 1% |
| 13% | 3% |
| 6%  | 1% |
| 20% | 3% |
| 14% | 3% |
| 11% | 2% |
| 13% | 2% |
| 8%  | 2% |
| 13% | 3% |
| 87% | 2% |
| 29% | 3% |
| 11% | 2% |
| 19% | 3% |
| 21% | 3% |
| 20% | 3% |

|     |    |
|-----|----|
| 24% | 3% |
| 11% | 2% |
| 19% | 3% |
| 41% | 4% |
| 27% | 3% |
| 18% | 2% |
| 13% | 2% |
| 7%  | 2% |
| 18% | 3% |
| 17% | 2% |
| 7%  | 2% |
| 2%  | 1% |
| 90% | 2% |
| 89% | 2% |
| 4%  | 1% |
| 12% | 2% |
| 19% | 2% |
| 16% | 3% |
| 38% | 4% |
| 1%  | 1% |
| 10% | 2% |
| 7%  | 2% |
| 27% | 3% |
| 22% | 3% |
| 16% | 2% |
| 11% | 2% |
| 16% | 3% |
| 4%  | 1% |
| 24% | 3% |
| 11% | 2% |
| 11% | 2% |
| 3%  | 1% |
| 1%  | 1% |
| 6%  | 2% |

|     |    |
|-----|----|
| 20% | 3% |
| 14% | 2% |
| 24% | 3% |
| 5%  | 1% |
| 7%  | 2% |
| 9%  | 2% |
| 8%  | 2% |
| 20% | 3% |
| 10% | 2% |
| 14% | 2% |
| 13% | 2% |
| 1%  | 1% |
| 22% | 3% |
| 7%  | 2% |
| 21% | 3% |
| 35% | 4% |
| 19% | 3% |
| 8%  | 2% |
| 18% | 3% |
| 13% | 2% |
| 10% | 2% |
| 52% | 4% |
| 57% | 4% |
| 23% | 3% |
| 26% | 3% |
| 15% | 2% |
| 1%  | 1% |
| 16% | 2% |
| 13% | 2% |
| 38% | 3% |
| 57% | 5% |
| 10% | 2% |
| 51% | 4% |
| 43% | 3% |

|     |    |
|-----|----|
| 2%  | 1% |
| 6%  | 2% |
| 14% | 2% |
| 3%  | 1% |
| 59% | 3% |
| 5%  | 2% |
| 14% | 2% |
| 33% | 3% |
| 21% | 3% |
| 12% | 2% |
| 27% | 3% |
| 12% | 2% |
| 27% | 3% |
| 9%  | 2% |
| 22% | 3% |
| 36% | 3% |
| 37% | 4% |
| 47% | 3% |
| 17% | 3% |
| 12% | 2% |
| 15% | 3% |
| 9%  | 2% |
| 18% | 3% |
| 54% | 4% |
| 14% | 2% |
| 79% | 2% |
| 13% | 3% |
| 20% | 3% |
| 22% | 3% |
| 24% | 3% |
| 8%  | 2% |
| 32% | 3% |
| 26% | 4% |
| 29% | 3% |

|     |    |
|-----|----|
| 10% | 2% |
| 9%  | 2% |
| 12% | 2% |
| 52% | 4% |
| 18% | 3% |
| 33% | 3% |
| 37% | 4% |
| 13% | 2% |
| 14% | 3% |
| 33% | 3% |
| 19% | 3% |
| 17% | 2% |
| 25% | 3% |
| 15% | 3% |
| 61% | 4% |
| 9%  | 2% |
| 23% | 4% |
| 20% | 3% |
| 55% | 3% |
| 5%  | 1% |
| 72% | 3% |
| 14% | 2% |
| 25% | 3% |
| 15% | 3% |
| 23% | 3% |
| 9%  | 2% |
| 17% | 3% |
| 24% | 3% |
| 19% | 3% |
| 14% | 2% |
| 11% | 2% |
| 14% | 2% |
| 14% | 3% |
| 35% | 3% |

|     |    |
|-----|----|
| 14% | 2% |
| 44% | 3% |
| 39% | 3% |
| 13% | 2% |
| 11% | 2% |
| 25% | 3% |
| 27% | 3% |
| 7%  | 2% |
| 29% | 3% |
| 16% | 2% |
| 28% | 3% |
| 21% | 2% |
| 19% | 3% |
| 30% | 3% |
| 6%  | 2% |
| 25% | 3% |
| 15% | 2% |
| 11% | 2% |
| 15% | 2% |
| 40% | 4% |
| 16% | 3% |
| 15% | 2% |
| 22% | 2% |
| 17% | 3% |
| 40% | 3% |
| 23% | 3% |
| 11% | 2% |
| 16% | 2% |
| 14% | 2% |
| 19% | 3% |
| 19% | 3% |
| 19% | 2% |
| 65% | 3% |
| 14% | 2% |



|     |    |
|-----|----|
| 35% | 4% |
| 22% | 3% |
| 15% | 2% |
| 30% | 3% |
| 20% | 3% |
| 21% | 3% |
| 16% | 3% |
| 42% | 3% |
| 2%  | 1% |
| 19% | 3% |
| 14% | 2% |
| 10% | 2% |
| 27% | 3% |
| 13% | 2% |
| 17% | 3% |
| 10% | 3% |
| 28% | 3% |
| 23% | 3% |
| 9%  | 2% |
| 48% | 4% |
| 14% | 2% |
| 54% | 4% |
| 39% | 3% |
| 34% | 4% |
| 17% | 2% |
| 28% | 3% |
| 16% | 3% |
| 14% | 2% |
| 34% | 3% |
| 12% | 2% |
| 21% | 3% |
| 14% | 2% |
| 17% | 3% |
| 13% | 2% |

|     |    |
|-----|----|
| 14% | 2% |
| 32% | 3% |
| 30% | 4% |
| 50% | 4% |
| 12% | 2% |
| 15% | 2% |
| 17% | 3% |
| 10% | 2% |
| 20% | 3% |
| 17% | 2% |
| 8%  | 2% |
| 14% | 3% |
| 11% | 3% |
| 11% | 2% |
| 19% | 3% |
| 6%  | 2% |
| 12% | 3% |
| 19% | 3% |
| 33% | 3% |
| 14% | 2% |
| 15% | 2% |
| 15% | 2% |
| 14% | 2% |
| 33% | 3% |
| 32% | 3% |
| 27% | 3% |
| 13% | 3% |
| 39% | 3% |
| 11% | 2% |
| 46% | 3% |
| 36% | 3% |
| 12% | 3% |
| 27% | 3% |
| 29% | 4% |

|     |    |
|-----|----|
| 23% | 3% |
| 21% | 3% |
| 7%  | 2% |
| 61% | 3% |
| 42% | 3% |
| 34% | 3% |
| 9%  | 2% |
| 11% | 2% |
| 26% | 4% |
| 22% | 3% |
| 19% | 3% |
| 11% | 2% |
| 22% | 2% |
| 20% | 3% |
| 17% | 3% |
| 18% | 3% |
| 31% | 3% |
| 13% | 2% |
| 28% | 3% |
| 7%  | 2% |
| 23% | 3% |
| 17% | 2% |
| 15% | 3% |
| 18% | 3% |
| 13% | 2% |
| 17% | 2% |
| 11% | 2% |
| 14% | 2% |
| 14% | 2% |
| 24% | 3% |
| 22% | 3% |
| 6%  | 2% |
| 28% | 3% |
| 17% | 3% |

|     |    |
|-----|----|
| 21% | 3% |
| 27% | 4% |
| 10% | 2% |
| 54% | 2% |
| 25% | 3% |
| 17% | 2% |
| 36% | 3% |
| 14% | 2% |
| 10% | 2% |
| 98% | 1% |
| 17% | 2% |
| 26% | 3% |
| 19% | 2% |
| 15% | 3% |
| 2%  | 1% |
| 23% | 3% |
| 41% | 4% |
| 34% | 3% |
| 22% | 3% |
| 18% | 3% |
| 43% | 4% |
| 44% | 4% |
| 22% | 3% |
| 12% | 2% |
| 29% | 3% |
| 95% | 1% |
| 38% | 3% |
| 90% | 3% |
| 21% | 4% |
| 19% | 3% |
| 15% | 2% |
| 14% | 2% |
| 18% | 3% |
| 21% | 3% |

|     |    |
|-----|----|
| 35% | 3% |
| 52% | 4% |
| 24% | 2% |
| 30% | 3% |
| 33% | 3% |
| 18% | 3% |
| 10% | 2% |
| 41% | 3% |
| 14% | 3% |
| 19% | 3% |
| 87% | 2% |
| 33% | 3% |
| 14% | 3% |
| 36% | 4% |
| 18% | 2% |
| 15% | 2% |
| 19% | 2% |
| 19% | 3% |
| 29% | 3% |
| 5%  | 2% |
| 23% | 4% |
| 8%  | 2% |
| 27% | 3% |
| 26% | 3% |
| 24% | 3% |
| 13% | 2% |
| 37% | 4% |
| 25% | 3% |
| 13% | 2% |
| 16% | 2% |
| 6%  | 2% |
| 21% | 3% |
| 43% | 3% |
| 30% | 3% |

|     |    |
|-----|----|
| 13% | 2% |
| 25% | 3% |
| 12% | 2% |
| 22% | 3% |
| 33% | 4% |
| 10% | 2% |
| 18% | 2% |
| 14% | 3% |
| 28% | 4% |
| 14% | 2% |
| 39% | 3% |
| 26% | 4% |
| 16% | 3% |
| 49% | 4% |
| 20% | 3% |
| 15% | 2% |
| 24% | 3% |
| 21% | 3% |
| 14% | 2% |
| 41% | 4% |
| 13% | 2% |
| 32% | 3% |
| 13% | 2% |
| 14% | 2% |
| 45% | 2% |
| 25% | 3% |
| 21% | 3% |
| 10% | 2% |
| 36% | 4% |
| 25% | 3% |
| 13% | 2% |
| 28% | 3% |
| 40% | 4% |
| 21% | 3% |

|     |    |
|-----|----|
| 15% | 3% |
| 16% | 3% |
| 20% | 2% |
| 51% | 3% |
| 16% | 2% |
| 11% | 2% |
| 16% | 3% |
| 81% | 3% |
| 7%  | 2% |
| 13% | 3% |
| 21% | 3% |
| 13% | 2% |
| 39% | 4% |
| 28% | 3% |
| 16% | 4% |
| 11% | 2% |
| 13% | 2% |
| 8%  | 2% |
| 10% | 2% |
| 13% | 2% |
| 12% | 2% |
| 36% | 3% |
| 14% | 2% |
| 11% | 2% |
| 13% | 3% |
| 20% | 3% |
| 10% | 2% |
| 54% | 5% |
| 10% | 2% |
| 24% | 3% |
| 14% | 2% |
| 21% | 3% |
| 12% | 2% |
| 13% | 2% |

|     |    |
|-----|----|
| 18% | 3% |
| 97% | 1% |
| 21% | 3% |
| 7%  | 2% |
| 12% | 3% |
| 19% | 3% |
| 29% | 3% |
| 24% | 3% |
| 11% | 2% |
| 9%  | 2% |
| 20% | 3% |
| 20% | 3% |
| 17% | 2% |
| 18% | 2% |
| 23% | 3% |
| 16% | 3% |
| 13% | 2% |
| 25% | 3% |
| 18% | 2% |
| 11% | 2% |
| 32% | 3% |
| 16% | 2% |
| 10% | 2% |
| 18% | 3% |
| 83% | 3% |
| 10% | 2% |
| 23% | 3% |
| 42% | 4% |
| 40% | 3% |
| 27% | 3% |
| 9%  | 2% |
| 39% | 4% |
| 23% | 3% |
| 21% | 2% |



|     |    |
|-----|----|
| 46% | 4% |
| 30% | 3% |
| 14% | 3% |
| 22% | 3% |
| 54% | 4% |
| 19% | 3% |
| 16% | 3% |
| 35% | 4% |
| 29% | 3% |
| 4%  | 2% |
| 13% | 2% |
| 14% | 2% |
| 20% | 3% |
| 22% | 3% |
| 64% | 3% |
| 3%  | 1% |
| 5%  | 2% |
| 29% | 3% |
| 21% | 3% |
| 22% | 3% |
| 73% | 3% |
| 10% | 2% |
| 25% | 3% |
| 60% | 3% |
| 18% | 3% |
| 23% | 3% |
| 12% | 2% |
| 41% | 4% |
| 18% | 4% |
| 14% | 2% |
| 7%  | 2% |
| 15% | 3% |
| 16% | 3% |
| 11% | 2% |

|     |    |
|-----|----|
| 15% | 3% |
| 42% | 4% |
| 15% | 3% |
| 24% | 3% |
| 16% | 3% |
| 66% | 3% |
| 22% | 3% |
| 25% | 3% |
| 13% | 2% |
| 39% | 3% |
| 23% | 3% |
| 13% | 3% |
| 11% | 2% |
| 11% | 2% |
| 30% | 3% |
| 19% | 2% |
| 30% | 3% |
| 10% | 2% |
| 22% | 3% |
| 4%  | 1% |
| 30% | 3% |
| 6%  | 2% |
| 20% | 3% |
| 18% | 3% |
| 35% | 4% |
| 14% | 2% |
| 19% | 3% |
| 22% | 3% |
| 28% | 3% |
| 10% | 2% |
| 27% | 3% |
| 16% | 3% |
| 9%  | 2% |
| 17% | 3% |

|     |    |
|-----|----|
| 4%  | 1% |
| 38% | 4% |
| 9%  | 2% |
| 70% | 3% |
| 7%  | 2% |
| 13% | 2% |
| 30% | 4% |
| 14% | 3% |
| 26% | 4% |
| 28% | 3% |
| 11% | 2% |
| 29% | 3% |
| 50% | 4% |
| 16% | 2% |
| 76% | 3% |
| 9%  | 2% |
| 14% | 2% |
| 11% | 2% |
| 12% | 3% |
| 20% | 2% |
| 21% | 2% |
| 18% | 3% |
| 12% | 2% |
| 19% | 3% |
| 29% | 3% |
| 10% | 2% |
| 7%  | 2% |
| 10% | 2% |
| 18% | 3% |
| 17% | 3% |
| 15% | 2% |
| 29% | 4% |
| 11% | 2% |
| 5%  | 1% |

|  |     |    |
|--|-----|----|
|  | 25% | 3% |
|  | 13% | 2% |
|  | 16% | 3% |
|  | 7%  | 2% |
|  | 14% | 3% |
|  | 7%  | 2% |
|  | 13% | 2% |
|  | 35% | 4% |
|  | 39% | 3% |
|  | 23% | 3% |
|  | 5%  | 1% |
|  | 29% | 3% |
|  | 16% | 2% |
|  | 16% | 3% |
|  | 16% | 2% |
|  | 15% | 2% |
|  | 18% | 2% |
|  | 17% | 3% |
|  | 20% | 3% |
|  | 16% | 3% |
|  | 23% | 3% |
|  | 45% | 4% |
|  | 31% | 4% |
|  | 16% | 2% |
|  | 19% | 3% |
